# Supplementary material for: Reactive oxygen species activity and chemical speciation of size-fractionated atmospheric particulate matter from Lahore, Pakistan: an important role for transition metals
Source: Royal Society of Chemistry journal article supplement (doi:10.1039/b915008k), 2009-12-23
Supplement: b915008k.pdf [file b915008k.pdf]

Supplementary Material (ESI) for Journal of Environmental Monitoring  
This journal is © The Royal Society of Chemistry 2009

**Electronic Supplementary Information for:**

**Reactive Oxygen Species Activity and Chemical Speciation of Size-Fractionated Atmospheric Particulate Matter from Lahore Pakistan: An Important Role for Transition Metals.**

**Martin M. Shafer,<sup>1,\*</sup>, Dawn A. Perkins<sup>2</sup>, Dagmara S. Antkiewicz<sup>2</sup>, Elizabeth A. Stone<sup>1</sup>, Tauseef A. Quraishi<sup>3</sup>, James J. Schauer<sup>1</sup>**

<sup>1</sup>Environmental Chemistry and Technology Program, University of Wisconsin-Madison, 660 North Park Street, Madison, WI, 53706, USA

<sup>2</sup>Environmental Toxicology Department, Wisconsin State Laboratory of Hygiene, 2601 Agriculture Drive, Madison, WI, 53718, USA

<sup>3</sup>Institute of Environmental Engineering and Research, University of Engineering and Technology, G.T. Road, Lahore 54890, Pakistan

### Summary of ROS Methodology

The sample extracts were prepared for ROS analysis by adding an aliquot of 10X concentrated solution of salts glucose medium (SGM). Cultured non-adherent macrophage cells were harvested and gently concentrated by centrifugation at 750 RPM for 5 minutes, the culture media removed, and replaced with SGM to produce a cell suspension of 1000 cells/ $\mu\text{L}$ . Macrophage cells (100  $\mu\text{L}$  =100,000 cells) were dispensed into each well of a 96 well plate and incubated for 2 hours in a 37 °C incubator under a 6%  $\text{CO}_2$  atmosphere. Approximately 15 minutes before the end of the incubation period, DCFH-DA was added to each prepared sample to achieve a final concentration of 45  $\mu\text{M}$ . After the incubation period, during which time >98% of the cells have settled and adhered to the well bottom, the SGM was pipetted off and immediately replaced with 100  $\mu\text{L}$  of the SGM-buffered sample extract or control sample. The plate was returned to the 37 °C incubator for 2.5 hours after which time the fluorescence intensity of each well was determined at 504 nm excitation and 529 nm emission (515 nm cutoff) using a m5e microplate reader (Molecular Devices). Un-opsonized zymosan, a  $\beta$ -1,3 polysaccharide of D-glucose, which is recognized by TLR-2 receptors on macrophage cells, activating a strong immuno-chemical response<sup>S1</sup> was used as a positive control for ROS induction.<sup>S2-S3</sup> Raw fluorescence data was blank-control corrected and normalized to the zymosan controls to account for minor variations in method sensitivity and to aid comparisons between studies. All samples, as well as positive (zymosan) and negative (method blanks) controls were analyzed in triplicate (3-wells). A minimum of six dilutions (each of them in triplicate) of every sample extract

were run to ensure that a linear dose-response region could be identified. Overall uncertainty in the ROS method was estimated by propagating the standard deviation of the triplicate ROS measurements with the standard deviation of the applied method blank. These values ranged from 8.3 to 50% (median = 17.7%, n=52). Our previous studies<sup>31</sup> demonstrated that sample duplicate precision (i.e. filter splits carried through the full extraction and analysis procedure) in the range of 3 to 4% RPD can be expected.

S1 A.C. Mörk, R.J. Helmke, J.R. Martinez, M.T. Michalek, M. L. Patchen and G.H. Zhang, *Immunopharmacology*, 1998, **40**, 77-89.

S2 J. Giron-Calle and H.J. Forman, *American Journal of Respiratory Cell and Molecular Biology*, 2000, **23**, 748-754.

S3 J.F. Long, P.K. Dutta and B.D. Hogg, *Environ. Health Perspect.*, 1997, **105**, 706-711.

### **Further Discussion of Chelex and DFO Methods, Controls and Validation**

Outcomes of the negative and positive controls (refer to Methods section) suggest that the Chelex and DFO treatments did not introduce significant ROS contamination or suppression of ROS activity; therefore we believe the sample outcomes to be reasonable free of biases sourced from the ligands themselves and general method handling. The Chelex separations were run under conditions that our previous work has demonstrated is essentially quantitative in removing labile metals from dilute aqueous solutions.<sup>S4</sup> In environmental samples, natural ligands will compete with the immobilized-Chelex ligands for metals, and thus metal removal will to some extent depend upon the competing kinetics of complexation, thus the term Chelex non-labile for the species not retained on the column. While this separation paradigm may at one level appear problematic, in actual biochemical terms it is actually very relevant, as metal acquisition and subsequent toxicity by organisms/cells can in many situations be viewed and modeled as a competitive ligand process.<sup>S5</sup> Thus, we consider the Chelex-labile fraction to have enhanced biological toxicity relevance. To check whether with natural samples we were saturating the Chelex column or operating in a sensitive kinetic region, two Chelex-processed samples were subsequently re-processed through new columns under the same operating conditions. While some metal retention was noted, the additional fractional removal was small (4-12%) and the impact on our estimates of Chelex-labile ROS, negligible. Additionally, we observed no statistically significant relationship between the percentage removal of ROS activity and the total ROS activity (n=24). The 30-minute DFO equilibration time applied is ample time for

equilibrium to be established between labile iron species and the DFO-ligand.<sup>S6-S7</sup>

Removal of soluble organic material (WSOC) on Chelex is expected to be low at the circumneutral pH of the extracts ( $6.4 \pm 0.4$ ,  $n=30$ ) (WSOC at these pHs is typically negatively charged and interaction with the Chelex functional groups and support resin is minimal).

S4 M.M. Shafer, S.R. Hoffmann, J.T. Overdier and D.E. Armstrong, *Environ. Sci. Technol.*, 2004, **38**, 3810-3819.

S5 V. Slaveykova and K.J. Wilkinson, *Environmental Chemistry*, 2005, **2**, 9-24.

S6 S-F. Cheah, S.M. Kraemer, J. Cervini-Silva and G. Sposito (2003). *Chem. Geol.* 2003, **198**, 63-75.

S7 B. Faller and H. Nick, *J. Am. Chem. Soc.*, 1994, **116**, 3860-3865.

### Statistical Summary

**Table S1: Pearson Correlation Coefficients, Ranked, Pooled PM10 + PM2.5.**

| Untreated    |                 | Untreated-Chelexed |            | Chelexed      |            |
|--------------|-----------------|--------------------|------------|---------------|------------|
| r            | Element         | r                  | Element    | r             | Element    |
| <b>0.827</b> | <b>Mn</b>       | <b>0.812</b>       | <b>Co</b>  | <b>0.913</b>  | <b>W</b>   |
| <b>0.816</b> | <b>Co</b>       | <b>0.802</b>       | <b>Mn</b>  | <b>0.893</b>  | <b>Fe</b>  |
| <b>0.765</b> | <b>Ni</b>       | <b>0.741</b>       | <b>Ni</b>  | <b>0.869</b>  | <b>Al</b>  |
| <b>0.746</b> | <b>Mg</b>       | <b>0.731</b>       | <b>Mg</b>  | <b>0.864</b>  | <b>Sn</b>  |
| <b>0.741</b> | <b>Ba</b>       | <b>0.728</b>       | <b>Ce</b>  | <b>0.862</b>  | <b>As</b>  |
| <b>0.735</b> | <b>Na</b>       | <b>0.724</b>       | <b>Ba</b>  | <b>0.860</b>  | <b>Ti</b>  |
| <b>0.724</b> | <b>Mass</b>     | <b>0.699</b>       | <b>Pd</b>  | <b>0.847</b>  | <b>Cr</b>  |
| <b>0.720</b> | <b>Pd</b>       | <b>0.680</b>       | <b>Ca</b>  | <b>0.816</b>  | <b>Sc</b>  |
| <b>0.719</b> | <b>K</b>        | <b>0.675</b>       | <b>K</b>   | <b>0.793</b>  | <b>Th</b>  |
| <b>0.715</b> | <b>Ce</b>       | <b>0.672</b>       | <b>Sr</b>  | <b>0.778</b>  | <b>V</b>   |
| <b>0.706</b> | <b>Ca</b>       | <b>0.627</b>       | <b>Li</b>  | <b>0.776</b>  | <b>P</b>   |
| <b>0.705</b> | <b>S</b>        | <b>0.617</b>       | <b>La</b>  | <b>0.771</b>  | <b>Yb</b>  |
| <b>0.699</b> | <b>Sulfate</b>  | <b>0.617</b>       | <b>Eu</b>  | <b>0.768</b>  | <b>Ho</b>  |
| <b>0.698</b> | <b>Sm</b>       | <b>0.600</b>       | <b>Pt</b>  | <b>0.765</b>  | <b>Lu</b>  |
| <b>0.695</b> | <b>U</b>        | <b>0.589</b>       | <b>Cd</b>  | <b>0.761</b>  | <b>Pr</b>  |
| <b>0.689</b> | <b>Sr</b>       | <b>0.584</b>       | <b>Rb</b>  | <b>0.760</b>  | <b>Sm</b>  |
| <b>0.684</b> | <b>Y</b>        | <b>0.581</b>       | <b>Cs</b>  | <b>0.754</b>  | <b>Nd</b>  |
| <b>0.683</b> | <b>REE</b>      | <b>0.573</b>       | <b>U</b>   | <b>0.754</b>  | <b>Dy</b>  |
| <b>0.675</b> | <b>La</b>       | <b>0.552</b>       | <b>Rh</b>  | <b>0.750</b>  | <b>Eu</b>  |
| <b>0.673</b> | <b>Nd</b>       | <b>0.540</b>       | <b>Y</b>   | <b>0.748</b>  | <b>REE</b> |
| <b>0.670</b> | <b>Yb</b>       | <b>0.527</b>       | <b>Sm</b>  | <b>0.747</b>  | <b>Mn</b>  |
| <b>0.667</b> | <b>Eu</b>       | <b>0.522</b>       | <b>Yb</b>  | <b>0.747</b>  | <b>Sr</b>  |
| <b>0.666</b> | <b>Li</b>       | <b>0.519</b>       | <b>REE</b> | <b>0.746</b>  | <b>La</b>  |
| <b>0.665</b> | <b>Dy</b>       | <i>0.500</i>       | <b>Fe</b>  | <b>0.739</b>  | <b>Y</b>   |
| <b>0.649</b> | <b>Ho</b>       | <i>0.498</i>       | <b>Se</b>  | <b>0.738</b>  | <b>Cd</b>  |
| <b>0.635</b> | <b>Pr</b>       | <i>0.495</i>       | <b>Dy</b>  | <b>0.710</b>  | <b>Mg</b>  |
| <b>0.621</b> | <b>Cd</b>       | <i>0.467</i>       | <b>Nd</b>  | <b>0.705</b>  | <b>Cu</b>  |
| <b>0.610</b> | <b>Fe</b>       | <i>0.466</i>       | <b>Cu</b>  | <b>0.698</b>  | <b>Pb</b>  |
| <b>0.608</b> | <b>Rb</b>       | <i>0.463</i>       | <b>Ho</b>  | <b>0.691</b>  | <b>Ce</b>  |
| <b>0.596</b> | <b>Lu</b>       | <i>0.449</i>       | <b>Pr</b>  | <b>0.684</b>  | <b>U</b>   |
| <b>0.591</b> | <b>Mo</b>       | <i>0.437</i>       | <b>Ag</b>  | <b>0.667</b>  | <b>Zn</b>  |
| <b>0.586</b> | <b>W</b>        | <i>0.397</i>       | <b>Tl</b>  | <b>0.635</b>  | <b>S</b>   |
| <b>0.583</b> | <b>Se</b>       | <i>0.376</i>       | <b>Cr</b>  | <b>0.597</b>  | <b>Ba</b>  |
| <b>0.583</b> | <b>Cs</b>       | <i>0.352</i>       | <b>Zn</b>  | <b>0.582</b>  | <b>Ni</b>  |
| <b>0.583</b> | <b>Nitrate</b>  | <i>0.306</i>       | <b>W</b>   | <b>0.556</b>  | <b>Mo</b>  |
| <b>0.562</b> | <b>Pt</b>       | <i>0.284</i>       | <b>As</b>  | <i>0.488</i>  | <b>Se</b>  |
| <b>0.559</b> | <b>WSOC</b>     | <i>0.271</i>       | <b>Sc</b>  | <i>0.488</i>  | <b>Ca</b>  |
| <b>0.555</b> | <b>Cr</b>       | <i>0.263</i>       | <b>Sn</b>  | <i>0.453</i>  | <b>K</b>   |
| <b>0.553</b> | <b>Sc</b>       | <i>0.250</i>       | <b>Al</b>  | <i>0.450</i>  | <b>Tl</b>  |
| <b>0.549</b> | <b>Rh</b>       | <i>0.244</i>       | <b>Lu</b>  | <i>0.366</i>  | <b>Co</b>  |
| <b>0.542</b> | <b>Ti</b>       | <i>0.224</i>       | <b>Th</b>  | <i>0.358</i>  | <b>Li</b>  |
| <b>0.536</b> | <b>Cu</b>       | <i>0.222</i>       | <b>Ti</b>  | <i>0.345</i>  | <b>Rb</b>  |
| <b>0.502</b> | <b>Ag</b>       | <i>0.210</i>       | <b>P</b>   | <i>0.246</i>  | <b>Cs</b>  |
| <i>0.494</i> | <b>As</b>       | <i>0.204</i>       | <b>Mo</b>  | <i>0.214</i>  | <b>Pd</b>  |
| <i>0.471</i> | <b>Sn</b>       | <i>0.188</i>       | <b>Pb</b>  | <i>0.090</i>  | <b>Sb</b>  |
| <i>0.461</i> | <b>Th</b>       | <i>0.143</i>       | <b>Sb</b>  | <i>0.043</i>  | <b>Rh</b>  |
| <i>0.433</i> | <b>EC</b>       | <i>0.105</i>       | <b>S</b>   | <i>-0.058</i> | <b>Ag</b>  |
| <i>0.410</i> | <b>Al</b>       | <i>0.079</i>       | <b>V</b>   | <i>-0.204</i> | <b>Pt</b>  |
| <i>0.407</i> | <b>OC</b>       |                    |            |               |            |
| <i>0.399</i> | <b>P</b>        |                    |            |               |            |
| <i>0.388</i> | <b>Tl</b>       |                    |            |               |            |
| <i>0.343</i> | <b>Zn</b>       |                    |            |               |            |
| <i>0.334</i> | <b>Chloride</b> |                    |            |               |            |
| <i>0.219</i> | <b>Pb</b>       |                    |            |               |            |
| <i>0.213</i> | <b>Sb</b>       |                    |            |               |            |
| <i>0.199</i> | <b>V</b>        |                    |            |               |            |
| <i>0.161</i> | <b>Ammonium</b> |                    |            |               |            |

**Bold: P < 0.01**   Normal: P < 0.05   *Italic: P > 0.05*



**Figure S2.** Cluster analysis summary. Cluster tree, Euclidean distance, Ward linkage.  
Panel B = PM2.5.

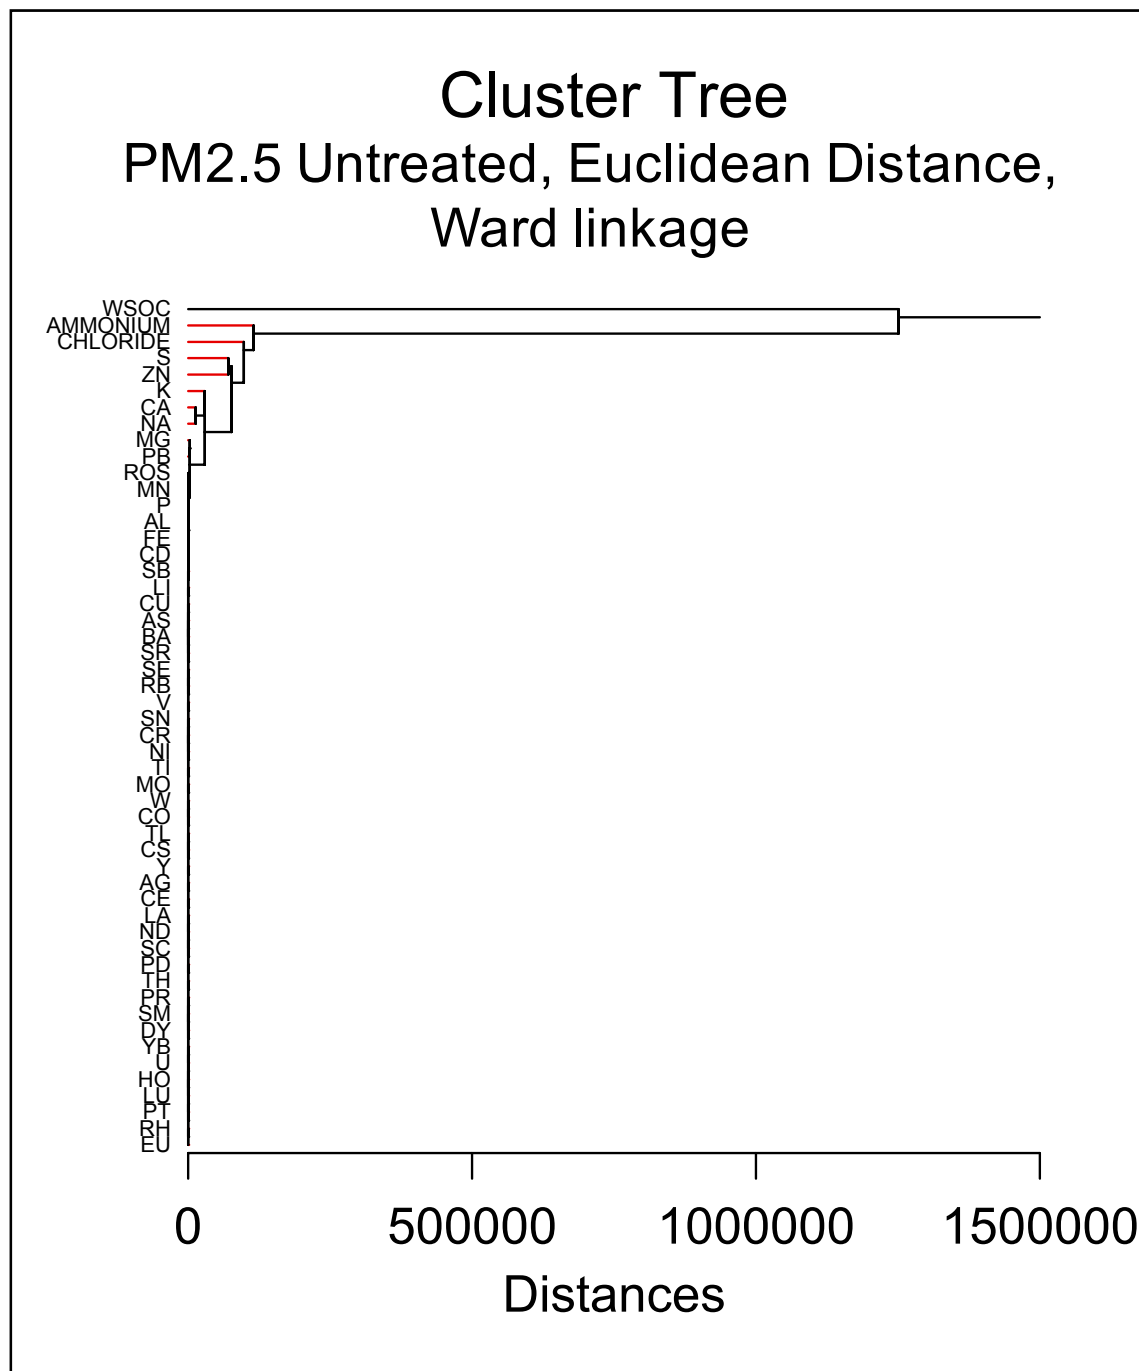



**Table S2: PCA Covariance Matrix, PM2.5 (Untreated – Chelexed)**

| <u>PM2.5</u>       |           |            |           |           |
|--------------------|-----------|------------|-----------|-----------|
| Component loadings |           |            |           |           |
|                    | 1         | 2          | 3         | 4         |
| ZN                 | 79291.996 | -12958.824 | 1365.873  | -202.316  |
| K                  | 21019.689 | 34558.211  | -8489.649 | 1571.107  |
| S                  | 6034.731  | 27679.033  | 9679.636  | 2502.171  |
| CA                 | 5712.736  | 22439.442  | 1874.286  | -5579.924 |
| MG                 | 669.133   | 1979.115   | 267.174   | -565.733  |
| ROS                | 388.084   | 376.794    | -224.949  | 121.729   |
| FE                 | 33.338    | 360.573    | 101.419   | 56.031    |
| AL                 | 98.296    | 215.233    | 140.442   | 48.175    |
| PB                 | 2667.380  | 1479.918   | 328.124   | 45.211    |
| P                  | 84.771    | 561.477    | 133.455   | 30.832    |
| SR                 | 4.178     | 32.179     | -0.073    | -14.696   |
| LI                 | 37.961    | 42.801     | -9.024    | -11.324   |
| CU                 | 2.720     | 33.905     | 6.763     | 10.879    |
| MN                 | 503.644   | 613.972    | 46.657    | -7.589    |
| AS                 | 5.435     | 23.778     | 8.750     | 4.542     |
| SE                 | 28.585    | 2.443      | -4.399    | 4.125     |
| V                  | -5.569    | 8.367      | 6.420     | 3.386     |
| RB                 | 20.582    | 4.266      | -4.216    | -3.094    |
| BA                 | 1.115     | 24.427     | -0.517    | 2.769     |
| SN                 | 2.546     | 14.221     | 2.593     | 2.530     |
| SB                 | 28.843    | 20.620     | 13.518    | -2.424    |
| NI                 | 4.643     | 11.341     | 2.892     | 1.990     |
| CD                 | 332.734   | 274.202    | 21.354    | 1.110     |
| CR                 | 2.873     | 6.241      | 2.889     | 0.941     |
| MO                 | 0.230     | 1.376      | 0.086     | 0.490     |
| TI                 | 0.928     | 5.462      | 1.202     | 0.295     |
| W                  | 0.368     | 1.889      | 0.434     | 0.127     |
| TL                 | 1.184     | 0.109      | 0.021     | -0.113    |
| Y                  | 0.033     | 0.279      | 0.072     | 0.059     |
| CS                 | 0.855     | 0.010      | 0.243     | -0.039    |
| CO                 | 0.439     | 1.638      | 0.120     | -0.026    |
| CE                 | 0.033     | 0.091      | -0.010    | 0.020     |
| LA                 | 0.023     | 0.086      | 0.025     | 0.020     |
| ND                 | 0.015     | 0.113      | 0.035     | 0.019     |
| AG                 | 0.069     | 0.185      | 0.003     | 0.015     |
| SC                 | 0.016     | 0.082      | 0.016     | 0.011     |
| TH                 | 0.005     | 0.036      | 0.008     | 0.006     |
| EU                 | 0.000     | 0.008      | -0.001    | 0.005     |
| PR                 | 0.004     | 0.027      | 0.007     | 0.004     |
| SM                 | 0.002     | 0.027      | 0.005     | 0.004     |
| DY                 | 0.002     | 0.025      | 0.007     | 0.004     |
| PD                 | 0.007     | 0.048      | -0.002    | -0.003    |
| RH                 | 0.007     | 0.004      | -0.006    | -0.002    |
| PT                 | 0.006     | 0.001      | -0.002    | 0.001     |
| U                  | 0.002     | 0.011      | 0.002     | 0.001     |
| YB                 | 0.002     | 0.014      | 0.003     | 0.001     |
| HO                 | 0.001     | 0.005      | 0.002     | 0.001     |
| LU                 | 0.000     | 0.002      | 0.001     | 0.000     |

  

| Variance Explained by Components |             |             |             |             |
|----------------------------------|-------------|-------------|-------------|-------------|
|                                  | 1           | 2           | 3           | 4           |
|                                  | 6.80620E+09 | 2.63906E+09 | 1.71429E+08 | 4.02497E+07 |

  

| Percent of Total Variance Explained |        |        |       |       |
|-------------------------------------|--------|--------|-------|-------|
|                                     | 1      | 2      | 3     | 4     |
|                                     | 70.467 | 27.323 | 1.775 | 0.417 |

**Table S3: PCA Covariance Matrix, PM10 (Untreated – Chelexed)**

| <u>PM10</u>                         |             |             |             |             |
|-------------------------------------|-------------|-------------|-------------|-------------|
| Component loadings                  |             |             |             |             |
|                                     | 1           | 2           | 3           | 4           |
| ZN                                  | 86207.860   | -13168.843  | -2320.460   | -2512.325   |
| CA                                  | 23572.308   | 30038.421   | 15610.194   | -3662.729   |
| K                                   | 18336.816   | 27872.616   | -14096.480  | 8706.140    |
| S                                   | 8720.012    | -10081.444  | 10519.906   | 16530.586   |
| PB                                  | 2366.573    | -385.880    | -304.502    | -565.978    |
| MG                                  | 1739.557    | 2465.070    | -236.478    | 269.849     |
| AL                                  | 117.219     | 173.289     | 238.303     | 187.532     |
| FE                                  | 111.956     | 331.748     | 64.130      | 150.035     |
| ROS                                 | 441.778     | 693.353     | -153.237    | -35.643     |
| CD                                  | 341.883     | 233.922     | -76.640     | -27.498     |
| MN                                  | 473.851     | 384.621     | 36.177      | -26.491     |
| P                                   | -29.329     | 115.888     | 88.598      | 25.393      |
| CU                                  | 11.021      | 23.841      | 19.633      | 20.895      |
| SN                                  | 5.644       | 0.547       | 3.746       | 13.799      |
| SR                                  | 27.021      | 44.259      | 19.080      | -13.408     |
| LI                                  | 56.888      | 16.692      | -8.701      | 10.576      |
| AS                                  | 12.047      | 4.047       | 5.576       | 7.580       |
| SE                                  | 30.012      | -0.689      | -5.605      | 5.289       |
| BA                                  | 16.406      | 22.702      | -1.815      | -5.256      |
| RB                                  | 19.598      | 5.171       | -7.250      | 3.711       |
| V                                   | -7.119      | 7.702       | 11.210      | 3.148       |
| SB                                  | 88.818      | -26.475     | 7.303       | 2.873       |
| TI                                  | -1.204      | 0.621       | 2.247       | 1.224       |
| MO                                  | 0.748       | 0.629       | 0.396       | 0.967       |
| CR                                  | 6.390       | 2.382       | 2.325       | 0.277       |
| NI                                  | 10.129      | 13.261      | 8.254       | 0.276       |
| AG                                  | 0.074       | 0.487       | 0.012       | 0.176       |
| TL                                  | 1.468       | 0.060       | -0.094      | 0.166       |
| CS                                  | 1.057       | 0.317       | -0.247      | -0.145      |
| CO                                  | 1.208       | 1.910       | 0.562       | 0.106       |
| Y                                   | 0.064       | 0.148       | 0.016       | 0.053       |
| LA                                  | 0.063       | 0.119       | 0.008       | 0.042       |
| W                                   | 0.123       | 0.509       | 0.090       | 0.036       |
| ND                                  | 0.035       | 0.043       | 0.010       | 0.032       |
| PD                                  | 0.033       | 0.107       | 0.006       | 0.032       |
| SC                                  | -0.007      | 0.013       | 0.029       | 0.016       |
| CE                                  | 0.154       | 0.235       | 0.005       | -0.016      |
| PR                                  | 0.007       | 0.010       | 0.003       | 0.007       |
| SM                                  | 0.005       | 0.010       | 0.002       | 0.005       |
| DY                                  | 0.003       | 0.012       | 0.003       | 0.004       |
| U                                   | -0.000      | 0.005       | -0.001      | 0.003       |
| EU                                  | 0.014       | 0.005       | 0.005       | -0.003      |
| YB                                  | 0.002       | 0.006       | 0.001       | 0.002       |
| TH                                  | -0.006      | 0.005       | 0.020       | -0.002      |
| RH                                  | 0.022       | 0.005       | -0.001      | -0.001      |
| HO                                  | 0.000       | 0.002       | 0.000       | 0.001       |
| LU                                  | -0.000      | 0.001       | 0.001       | 0.000       |
| PT                                  | 0.008       | 0.002       | -0.001      | 0.000       |
| Variance Explained by Components    |             |             |             |             |
|                                     | 1           | 2           | 3           | 4           |
|                                     | 8.40893E+09 | 1.96131E+09 | 5.58691E+08 | 3.69240E+08 |
| Percent of Total Variance Explained |             |             |             |             |
|                                     | 1           | 2           | 3           | 4           |
|                                     | 74.396      | 17.352      | 4.943       | 3.267       |

There are important similarities between the PCA and Cluster analyses, which provides added confidence in the overall statistical inferences. Focussing on the trace elements and ROS: in the PM<sub>10</sub> PCA model, factor 2 is defined by a dominant ROS loading, high loadings from Mn, Fe, Cd, Al and a negative loading from Zn. The major elements (Ca, Mg, K, S, P) all tend to group/load together. These results are nearly identical to those presented from the Cluster analysis. Quite similar outcomes were observed in factor 2 in the PM<sub>2.5</sub> PCA model, with the exception that Pb is more prominent (similar contrasts in Pb behaviour were also observed in the Cluster analysis between the two size-fractions). Factor 1 is dominated by Zn, but again ROS, Mn, Cd, and to a lesser extent than in Factor 2, Al, and Fe are significant in defining the factor. The behaviour of Zn in Factor 1 and 2 may be reflected in its position as the most distant trace element cluster in the Cluster analysis.
